# Supplementary material for: Effect of microwave assisted and conventional thermal heating on the evolution of nanostructured inorganic–organic hybrid materials to binary ZrO2–SiO2 oxides
Source: Royal Society of Chemistry journal article supplement (doi:10.1039/b707723h), 2007-01-01
Supplement: b707723h.pdf [file b707723h.pdf]

**SUPPLEMENTARY MATERIAL**

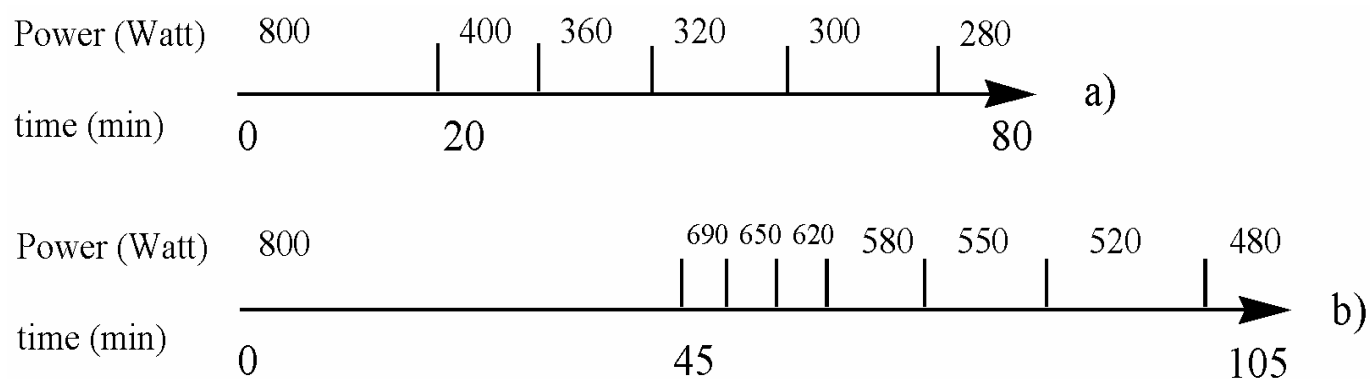

**Figure 1SM-** Power modulation as a function of time for the microwave treatments at 600°C (a) and 1000°C (b)

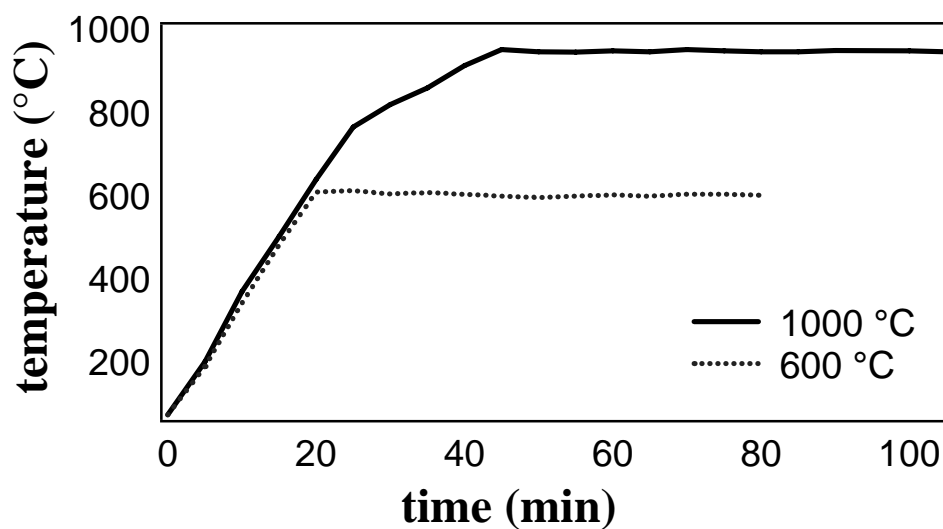

**Figure 2SM-** Power modulation as a function of time for the microwave treatments at 600°C (a) and 1000°C (b)

| <b>Time</b> | <b>Temperature 600</b> | <b>Temperature 800</b> | <b>Temperature 1000</b> |
|-------------|------------------------|------------------------|-------------------------|
| 0           | 74                     | 74                     | 74                      |
| 5           | 190                    | 190                    | 190                     |
| 10          | 343                    | 350                    | 370                     |
| 15          | 483                    | 483                    | 503                     |
| 20          | 626                    | 618                    | 640                     |
| 25          | 612                    | 736                    | 756                     |
| 30          | 605                    | 802                    | 822                     |
| 35          | 598                    | 808                    | 860                     |
| 40          | 063                    | 805                    | 914                     |
| 45          | 603                    | 800                    | 952                     |
| 50          | 600                    | 803                    | 947                     |
| 55          | 606                    | 805                    | 946                     |
| 60          | 604                    | 805                    | 947                     |
| 65          | 604                    | 807                    | 949                     |
| 70          | 602                    | 804                    | 949                     |
| 75          | 605                    | 803                    | 943                     |
| 80          | 602                    | 806                    | 946                     |
| 85          | -                      | 802                    | 947                     |
| 90          | -                      | 800                    | 949                     |
| 95          | -                      | -                      | 952                     |
| 100         | -                      | -                      | 970                     |
| 105         | -                      | -                      | 1000                    |

**Table 1SM.** Time (min) and temperature (°C) values of the three optimized microwave programs.
